# Supplementary material for: Antioxidant Behavioural Phenotype in the Immp2l Gene Knock-Out Mouse
Source: MDPI journal article supplement (doi:10.3390/genes14091717), 2023-08-28
Supplement: s1 [file s1]

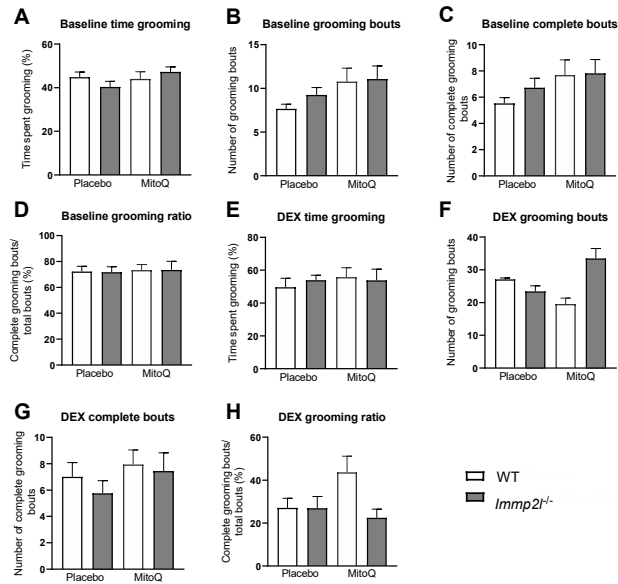

**Figure S1. Grooming behaviour in *Immmp2l<sup>KD</sup> -/-* KO mice treated with MitoQ.** **A-D.** Mean time spent grooming, number of grooming bouts, number of completed grooming bouts with the appropriate nose-to-flank sequence, and percentage of completed grooming bouts for *Immmp2l<sup>KD</sup> -/-* KO and wild-type mice treated with MitoQ or placebo (n = 12-15/group). **E-H.** Mean time spent grooming, number of grooming bouts, number of completed grooming bouts with the appropriate nose-to-flank sequence, and percentage of completed grooming bouts for *Immmp2l<sup>KD</sup> -/-* KO and wild-type mice treated with MitoQ or placebo in response to dexamphetamine (n = 8/group). Error bars represent SEM.
